# Supplementary material
Source: MDPI journal article supplement (https://www.mdpi.com/2073-4344/10/2/229)
Supplement: s1 [file s1]

# Supplementary Data

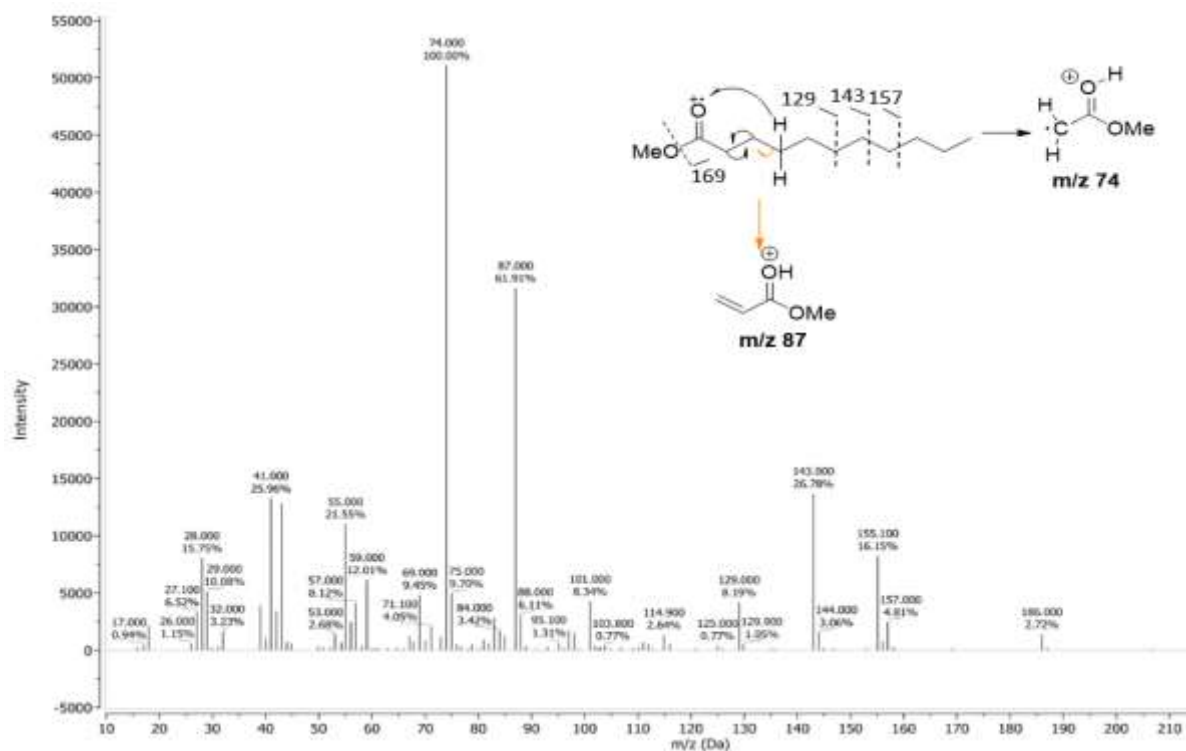

Figure S1. Mass spectrum of methyl-undecanoate at 6 min retention time.

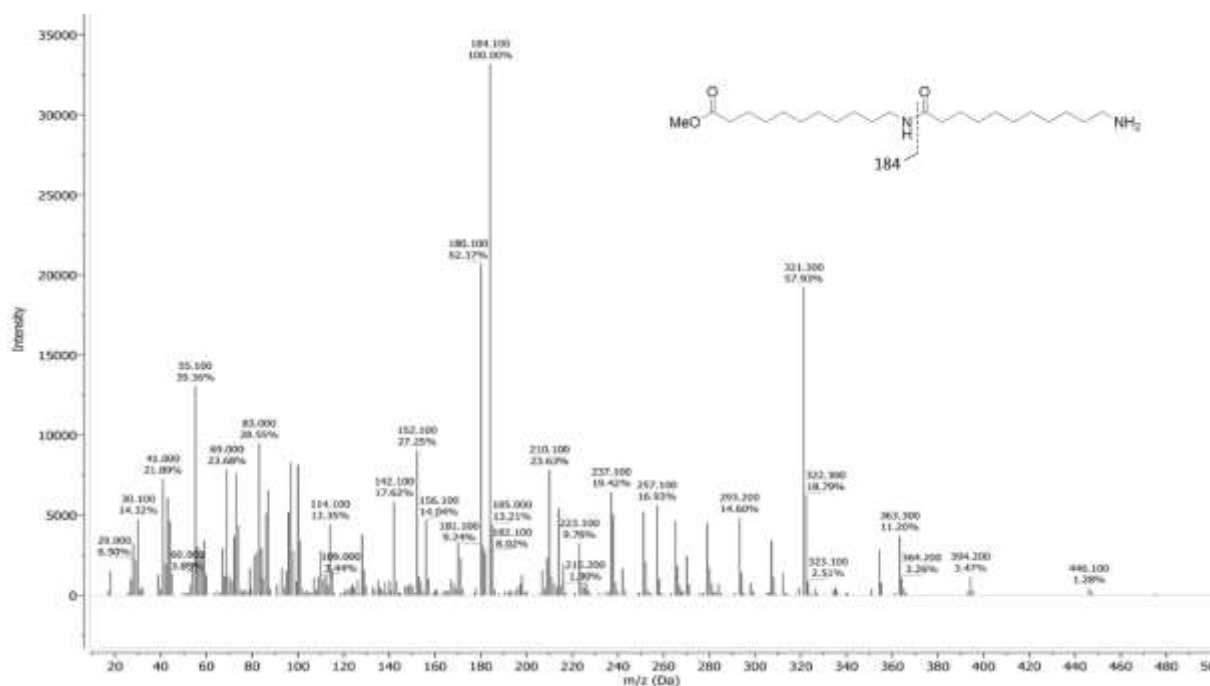

Figure S2. Mass spectrum of methyl-11-aminoundecanoate (AE11) dimer at 25.95 min retention time.
